# Supplementary material for: The structure and predictive value of intrinsic capacity in a longitudinal study of ageing
Source: PubMed Central journal article supplement (PMC6830681; doi:10.1136/bmjopen-2018-026119), 2019-11-02

## Supplementary analysis

**Table 1s : Sample characteristics**

| <b>Demographic and health characteristics</b> | <b>Wave 4</b> |
|-----------------------------------------------|---------------|
| <b>Age , mean (SD)</b>                        | 70.5 (7.9)    |
| <b>Sex</b>                                    |               |
| Male                                          | 3181(44.7%)   |
| Female                                        | 3925 (55.3%)  |
| <b>Education</b>                              |               |
| No education                                  | 2035(30.7%)   |
| Intermediate                                  | 2527(38.2%)   |
| Higher education                              | 2053(31.0%)   |
| <b>Wealth quintile</b>                        |               |
| 1 (lowest)                                    | 712 (12.9%)   |
| 2                                             | 1119(20.3%)   |
| 3                                             | 1192 (21.6%)  |
| 4                                             | 1184(21.4%)   |
| 5 (highest)                                   | 1302(23.6%)   |
| <b>Multimorbidity</b>                         |               |
| 0                                             | 1681(25.1%)   |
| 1 or 2                                        | 3647(54.3%)   |
| 3 or more                                     | 1381(20.6%)   |
| <b>Activities of daily living</b>             |               |
| No ADL limitation                             | 5745(80.8%)   |
| 1 or 2 limitations                            | 1082(15.2%)   |

|                                                |              |
|------------------------------------------------|--------------|
| 3 or more limitations                          | 280 (3.9%)   |
| <b>Instrumental activities of daily living</b> |              |
| No limitation                                  | 5582(78.5%)  |
| 1 or 2 limitations                             | 1228 (17.3%) |
| 3 or more limitations                          | 297 (4.2%)   |

**Table 2s : Model fit statistics of ESEM and CFA models**

| Models                                                             | Fit statistics |     |      |      |                      |
|--------------------------------------------------------------------|----------------|-----|------|------|----------------------|
|                                                                    | $\chi^2$       | df  | CFI  | TLI  | RMSEA (90% CI)       |
| <b>ESEM</b>                                                        |                |     |      |      |                      |
| One-factor                                                         | 5385.6         | 104 | 0.63 | 0.57 | 0.136 (0.133 -0.139) |
| Two-factors                                                        | 2570.8         | 89  | 0.82 | 0.76 | 0.101(0.098- 0.104)  |
| Three-factors                                                      | 927.5          | 75  | 0.94 | 0.90 | 0.064(0.061-0.068)   |
| Four- factors                                                      | 277.4          | 62  | 0.98 | 0.97 | 0.036(0.031-0.040)   |
| Five-factors                                                       | 117.9          | 50  | 0.99 | 0.98 | 0.022(0.017-0.030)   |
| Six-factors (one general factor and five sub-factors) <sup>1</sup> | 71.2           | 39  | 0.99 | 0.99 | 0.012(0.011-0.024)   |
| <b>CFA</b>                                                         |                |     |      |      |                      |
| One-factor                                                         | 6735.9         | 104 | 0.56 | 0.49 | 0.154(0.150-0.150)   |
| Second-order                                                       | 2369.9         | 102 | 0.94 | 0.92 | 0.073(0.070-0.080)   |
| Correlated five factors                                            | 1782.3         | 103 | 0.95 | 0.92 | 0.060(0.050-0.060)   |
| Bi-factor (one general factor and five sub-factors)                | 1180.6         | 89  | 0.98 | 0.97 | 0.035(0.033 -0.037)  |

<sup>1</sup> Bi-factor exploratory analysis is conducted in SEM framework.

**Table 3s: Construct validity of intrinsic capacity and sub-domain score**

| Demographic and health characteristics | Intrinsic capacity<br>Regression coefficient (95% CI) | Sensory<br>Regression coefficient (95% CI) | Cognitive<br>Regression coefficient (95% CI) | Vitality<br>Regression coefficient (95% CI) | Psychological<br>Regression coefficient (95% CI) | Locomotor<br>Regression coefficient (95% CI) |
|----------------------------------------|-------------------------------------------------------|--------------------------------------------|----------------------------------------------|---------------------------------------------|--------------------------------------------------|----------------------------------------------|
| <b>Age</b>                             | -0.052 (-0.054 to -0.046)***                          | -0.002(-0.008 to 0.003)                    | -0.02(-0.023 to -0.019)***                   | -0.021(-0.024 to -0.019)***                 | -0.003(-0.005 to -0.0003)*                       | -0.009(-0.011 to -0.007)***                  |
| <b>Sex</b>                             |                                                       |                                            |                                              |                                             |                                                  |                                              |
| Male                                   | Ref 1                                                 | Ref 1                                      | Ref 1                                        | Ref 1                                       | Ref 1                                            | Ref 1                                        |
| Female                                 | -0.322 (-0.358 to -0.286)***                          | 0.036(-0.037 to 0.110)                     | 0.27(0.240 to 0.302)***                      | -0.881(-0.905 to -0.857)***                 | -0.251 (-0.314 to -0.189)***                     | 0.099(0.059 to 0.139)***                     |
| <b>Education</b>                       |                                                       |                                            |                                              |                                             |                                                  |                                              |
| No education                           | Ref1                                                  | Ref 1                                      | Ref 1                                        | Ref 1                                       | Ref 1                                            | Ref 1                                        |
| Intermediate                           | 0.462(0.420 to 0.504)***                              | 0.085(0.037 to 0.133)***                   | 0.267(0.230 to 0.304)***                     | 0.068(0.029 to 0.106)***                    | 0.027(-0.017 to 0.073)                           | 0.058(0.028 to 0.094)***                     |
| Higher education                       | 0.779(0.735 to 0.823)***                              | 0.114(0.064 to 0.164)***                   | 0.4042)***                                   | 0.239 (0.198 to 0.279)**3                   | -0.015(-0.062 to 0.032)                          | 0.063(0.031 to 0.094)***                     |
| <b>Wealth quintile</b>                 |                                                       |                                            |                                              |                                             |                                                  |                                              |
| 1 (lowest)                             | Ref 1                                                 | Ref 1                                      | Ref 1                                        | Ref 1                                       | Ref 1                                            | Ref 1                                        |
| 2                                      | -0.020(-0.085 to 0.044)                               | 0.045(-0.025 to 0.116)                     | -0.072(-0.128 to -0.169)*                    | -0.072 (-0.132 to -0.129)*                  | -0.045(-0.113 to 0.230)                          | 0.049(0.003 to 0.095)**                      |
| 3                                      | 0.268( 0.204 to 0.332)***                             | 0.006(-0.150 to                            | 0.050 (-0.005 to                             | 0.016(-0.042 to                             | -0.017(-0.152 to                                 | 0.125(0.080 to 0.171)***                     |

|                                                |                              |                            |                           |                             |                             |                             |
|------------------------------------------------|------------------------------|----------------------------|---------------------------|-----------------------------|-----------------------------|-----------------------------|
|                                                |                              | 0.163)                     | 0.105)                    | 0.075)                      | 0.116)                      |                             |
| 4                                              | 0.448(0.384 to 0.512)***     | 0.016(-0.141 to 0.164)     | 0.111(0.056 to 0.166)***  | 0.073 (0.014 to 0.131)*     | -0.0530 (-0.119 to 0.0139)  | 0.155(0.110 to 0.200)***    |
| 5 (highest)                                    | 0.616(0.553 to 0.678)***     | 0.01(-0.142 to 0.159)      | 0.201 (0.147 to 0.255)*** | 0.099(0.041 to 0.156)**     | 0.055 (-0.074 to 0.184)     | 0.181(0.137 to 0.226)***    |
| <b>Multimorbidity</b>                          |                              |                            |                           |                             |                             |                             |
| 0                                              | Ref 1                        | Ref 1                      | Ref 1                     | Ref 1                       | Ref 1                       | Ref 1                       |
| 1 or 2                                         | -0.0237 (-0.279 to 0.195)*** | -0.068(-0.151 to 0.014)    | -0.012(-0.049 to 0.025)   | -0.122(-0.160 to 0.085)***  | 0.035(-0.010 to 0.077)      | -0.032(-0.061 to 0.003)*    |
| 3 or more                                      | -0.764(-0.816 to -0.712)***  | -0.057 (-0.151 to 0.014)   | -0.067(-0.114 to 0.021)** | -0.308 (-0.354 to 0.261)*** | -0.242(-0.350 to 0.133)***  | -0.221(-0.251 to 0.185)***  |
| <b>Activities of daily living</b>              |                              |                            |                           |                             |                             |                             |
| No ADL limitation                              | Ref 1                        | Ref 1                      | Ref 1                     | Ref 1                       | Ref 1                       | Ref 1                       |
| 1 or 2 limitations                             | --0.471(-0.510 to 0.432)***  | -0.105(-0.147 to 0.063)*** | -0.049(-0.082 to 0.016)** | -0.096 (-0.131 to 0.061)*** | -0.134 (-0.187 to 0.082)*** | -0.097(-0.122 to 0.072)***  |
| 3 or more limitations                          | -0.857(-0.918 to -0.797)***  | -0.116(-0.182 to 0.050)*** | -0.088(-0.082 to 0.016)** | -0.072(-0.127 to 0.018)***  | -0.028(-0.357 to 0.299)     | -0.317 (-0.356 to 0.279)*** |
| <b>Instrumental activities of daily living</b> |                              |                            |                           |                             |                             |                             |
| No limitation                                  | Ref 1                        | Ref 1                      | Ref 1                     | Ref 1                       | Ref 1                       | Ref 1                       |
| 1 or 2 limitations                             | -0.636(-0.677 to -0.596)***  | -0.097(-0.142 to -         | -0.077(-0.111 to -        | -0.127(-0.164 to -          | -0.105(-0.253 to            | -0.147 (-0.173 to -         |

|                       |                             |                            |                              |                            |                        |                              |
|-----------------------|-----------------------------|----------------------------|------------------------------|----------------------------|------------------------|------------------------------|
|                       |                             | 0.053)***                  | 0.042)***                    | 0.091)***                  | 0.043)                 | 0.121)***                    |
| 3 or more limitations | -1.067(-1.144 to -0.990)*** | -0.108(-0.193 to -0.023)** | -0.396 (-0.462 to -0.330)*** | -0.107(-0.177 to -0.036)** | 0.273(-0.108 to 0.656) | -0.259 (-0.309 to -0.209)*** |

\*\*\* p value < 0.001, \*\*p value <0.05.

**Table 4s: Regression coefficient of direct of intrinsic capacity on ADL and IADL and indirect effect through multimorbidity**

| Causal path                       | ADL                                        |                  | IADL                                       |                  |
|-----------------------------------|--------------------------------------------|------------------|--------------------------------------------|------------------|
|                                   | Standardized Coefficient (SE) <sup>1</sup> | P value          | Standardized Coefficient (SE) <sup>1</sup> | P value          |
| <b>Total effect</b>               |                                            |                  |                                            |                  |
| Intrinsic capacity                | <b>-0.52 (0.01)</b>                        | <b>&lt;0.001</b> | <b>-0.48(0.02)</b>                         | <b>&lt;0.001</b> |
| <b>Direct effect</b>              |                                            |                  |                                            |                  |
| Intrinsic capacity                | <b>-0.40(0.03)</b>                         | <b>&lt;0.001</b> | <b>-0.39(0.02)</b>                         | <b>&lt;0.001</b> |
| <b>Indirect effect</b>            |                                            |                  |                                            |                  |
| Intrinsic capacity→Multimorbidity | <b>-0.039(0.005)</b>                       | <b>&lt;0.001</b> | <b>-0.024(0.005)</b>                       | <b>&lt;0.001</b> |
|                                   | <b>R2=0.20, pvalue=&lt;0.001</b>           |                  | <b>R2= 0.21, pvalue=&lt;0.001</b>          |                  |

<sup>1</sup>Controlled for age, sex, education, and wealth

**Table 5s: Direct of and indirect effect personal characteristics on ADL and IADL in serial multiple mediators (intrinsic capacity and multimorbidity)**

| Causal path                                     | ADL                           |         | IADL                          |         |
|-------------------------------------------------|-------------------------------|---------|-------------------------------|---------|
|                                                 | Standardized Coefficient (SE) | P value | Standardized Coefficient (SE) | P value |
| <b>Direct effect</b>                            |                               |         |                               |         |
| Age                                             | 0.006(0.02)                   | 0.011   | 0.110 (0.03)                  | 0.001   |
| Sex                                             | -0.049(0.03)                  | 0.061   | -0.049(0.02)                  | 0.051   |
| Education                                       | 0.009(0.01)                   | 0.571   | -0.012(0.02)                  | 0.613   |
| Wealth                                          | -0.013(0.01)                  | 0.185   | 0.016(0.24)                   | 0.510   |
| Multimorbidity                                  | 0.036(0.01)                   | 0.001   | 0.020(0.02)                   | 0.402   |
| Intrinsic capacity                              | -0.099(0.02)                  | <0.000  | -0.142(0.02)                  | <0.001  |
| <b>Specific indirect effect</b>                 |                               |         |                               |         |
| Age → Intrinsic capacity                        | 0.053(0.01)                   | <0.001  | 0.050(0.01)                   | <0.001  |
| Age → multimorbidity                            | 0.011(0.04)                   | 0.004   | 0.003(0.01)                   | 0.405   |
| Female → intrinsic capacity                     | 0.047(0.010)                  | <0.001  | 0.048(0.01)                   | <0.001  |
| Female → multimorbidity                         | 0.008(0.003)                  | 0.008   | 0.002(0.003)                  | 0.409   |
| Education → intrinsic capacity                  | --0.022(0.01)                 | <0.001  | -0.02(0.01)                   | 0.001   |
| Education → multimorbidity                      | 0.000(0.002)                  | 0.810   | 0.00(0.00)                    | 0.817   |
| Wealth → intrinsic capacity                     | -0.021(0.01)                  | <0.001  | -0.021 (0.01)                 | <0.001  |
| Wealth → multimorbidity                         | -0.009(0.01)                  | 0.007   | -0.002(0.001)                 | 0.408   |
| <b>Indirect effect</b>                          |                               |         |                               |         |
| Age → Multimorbidity → Intrinsic capacity       | 0.002(0.001)                  | 0.002   | 0.002(0.001)                  | 0.002   |
| Female → Multimorbidity → Intrinsic capacity    | 0.002(0.001)                  | 0.004   | 0.002(0.001)                  | 0.004   |
| Education → Multimorbidity → Intrinsic capacity | 0.000(0.00)                   | 0.810   | 0.000(0.00)                   | 0.810   |
| Wealth → Multimorbidity → Intrinsic capacity    | -0.002(0.001)                 | 0.003   | -0.002(0.001)                 | 0.003   |

**Figure 1s: A statistical diagram of a simple mediation model (Direct and indirect ) effect of intrinsic capacity on ADL and IADL**

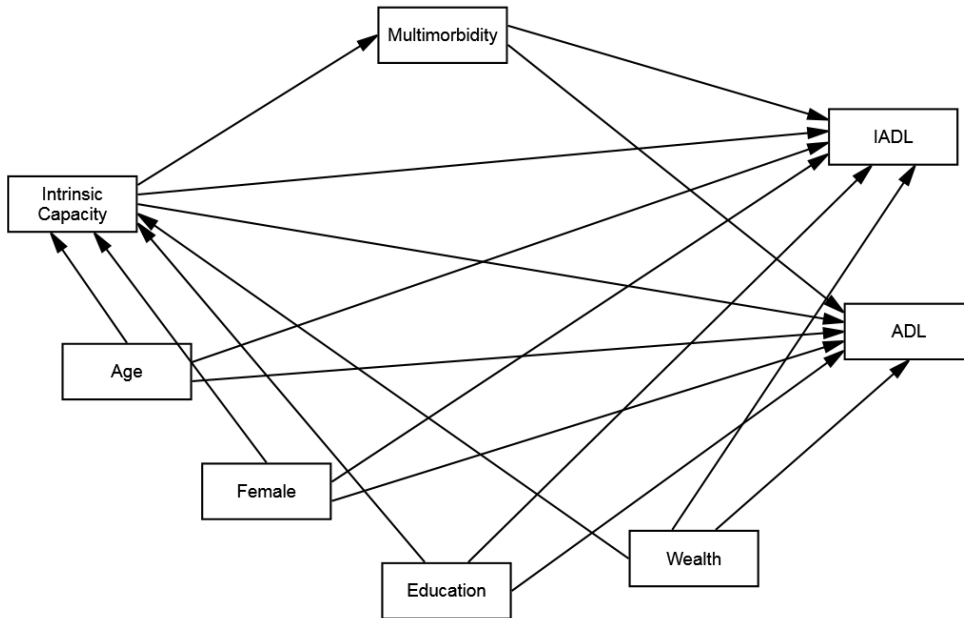

**Table 6s: Model fit information for Parallel and Sequential models examining pathways to ADL and IADL**

| <b>Models</b>                                                                                                                                           | <b>Fit statistics</b> |    |      |      |                     | <b>R2</b>                       |                                    |            |
|---------------------------------------------------------------------------------------------------------------------------------------------------------|-----------------------|----|------|------|---------------------|---------------------------------|------------------------------------|------------|
|                                                                                                                                                         | $\chi^2$              | df | CFI  | TLI  | REMSEA<br>(90% CI)  | <b>Multi<br/>morbi<br/>dity</b> | <b>Intrinsi<br/>c<br/>capacity</b> | <b>ADL</b> |
| <b>Activities of daily livings</b>                                                                                                                      |                       |    |      |      |                     |                                 |                                    |            |
| Model 1a : Effect of age (and other covariates) on ADL is either mediated by multimorbidity or intrinsic capacity                                       | 43.9                  | 5  | 0.96 | 0.89 | 0.06(0.04-0.08)     | 7.6%                            | 42.6%                              | 18.0%      |
| Model 1b : Effect of age(other covariates) on ADL is mediated by multimorbidity and intrinsic capacity                                                  | 16.3                  | 4  | 0.98 | 0.96 | 0.04(0.022 - 0.062) | 7.6%                            | 45.5%                              | 18.9%      |
| <b>Instrumental Activities of Daily Livings</b>                                                                                                         |                       |    |      |      |                     |                                 |                                    |            |
| Model 2a: Effect of age (and other covariates) on IADL is either mediated by multimorbidity or intrinsic capacity                                       | 55.6                  | 5  | 0.95 | 0.86 | 0.07(0.05-0.09)     | 7.8%                            | 42.7%                              | 35.4%      |
| Model 2b : Effect of age( and other covariates) on IADL is mediated by multimorbidity and intrinsic capacity                                            | 30.9                  | 4  | 0.97 | 0.91 | 0.05(0.04-0.08)     | 7.9%                            | 45.4%                              | 31.2%      |
| Model 2c : Effect of age( and other covariates) on IADL is mediated by intrinsic capacity ( with no direct path between multimorbidity and IADL) model) | 493                   | 4  | 0.99 | 0.99 | 0.05(0.03-0.06)     | 11.5%                           | 42%                                | 32%        |



Figure 2s : Interaction effect of age and intrinsic capacity on incidence IADL.

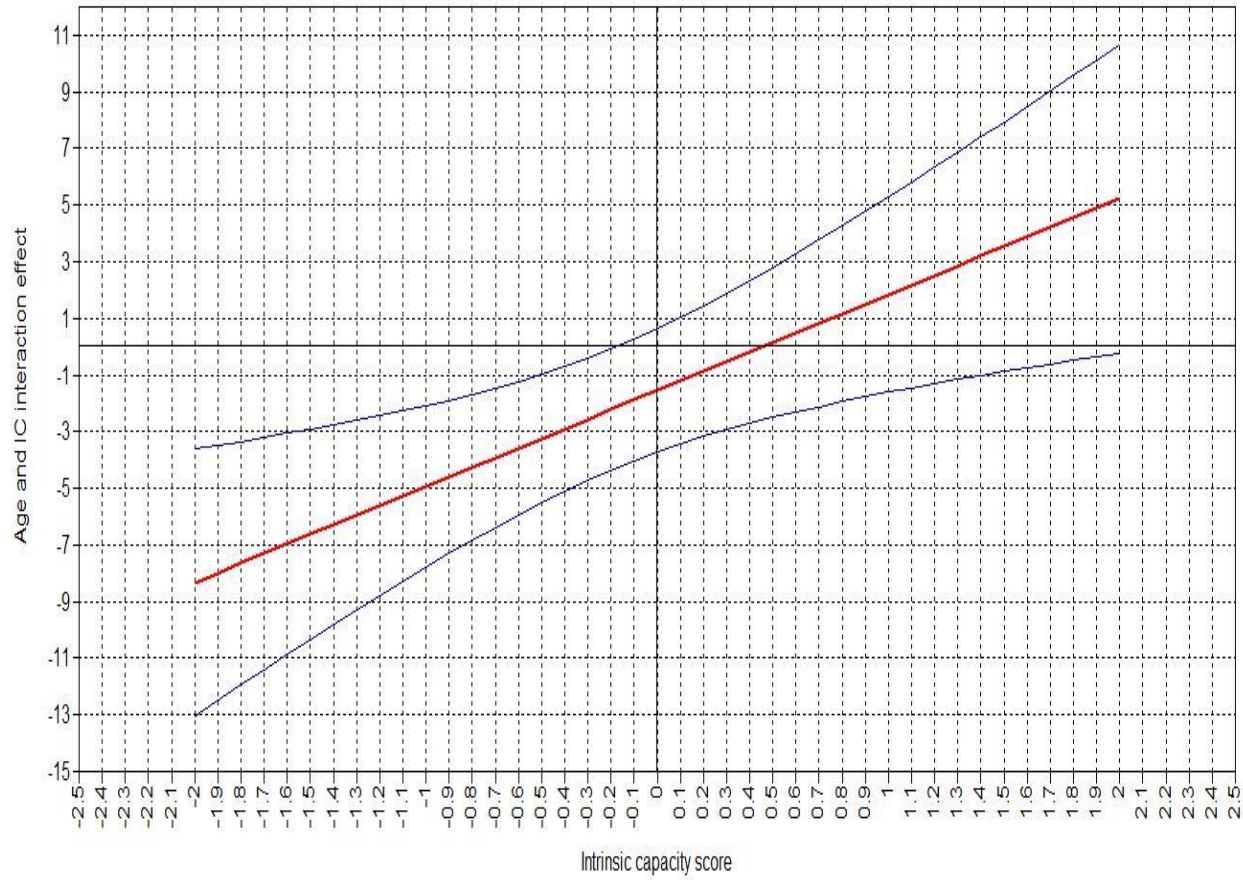

Supplement: bmjopen-2018-026119supp001.pdf [file bmjopen-2018-026119supp001.pdf]
